# Supplementary material for: Electric field induced rotation of halogenated organic linkers in isoreticular metal–organic frameworks for nanofluidic applications
Source: Royal Society of Chemistry journal article supplement (doi:10.1039/c8me00030a), 2018-01-01
Supplement: c8me00030a1.pdf [file c8me00030a1.pdf]

## Electronic Supplementary Information

### Electric Field Induced Rotation of Halogenated Organic Linkers in Isorecticular Metal-Organic Frameworks for Nanofluidic Applications

Sadanandam Namsani and A. Ozgur Yazaydin\*

Department of Chemical Engineering, University College London, Torrington Place, London, WC1E 7JE, United Kingdom

Table S1: The dipole moment of IRMOF-7 functionalized with different halogens as shown in Figure5.

| Halogen type | Total Dipole moment (D) |
|--------------|-------------------------|
| Br           | 1.3596                  |
| F            | 1.2498                  |
| Cl           | 1.5576                  |

Table S2: The force field parameters used in this work for to perform MD simulations\*

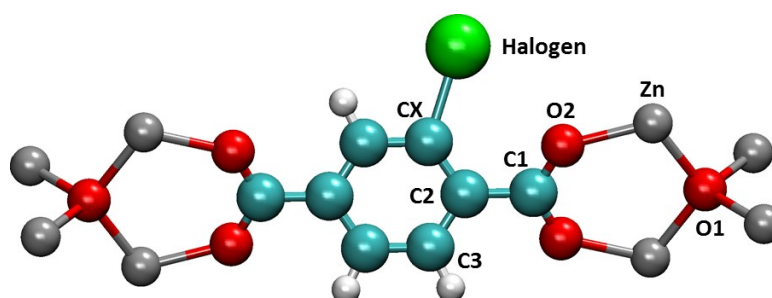

| Bond |    |                         |                       | Bend |    |    |                         |                    | Torsion |    |    |    |                         |                       |          |
|------|----|-------------------------|-----------------------|------|----|----|-------------------------|--------------------|---------|----|----|----|-------------------------|-----------------------|----------|
| i    | j  | k/k <sub>B</sub><br>(K) | R <sub>0</sub><br>(Å) | i    | j  | k  | k/k <sub>B</sub><br>(K) | θ <sub>0</sub> (°) | i       | j  | k  | l  | k/k <sub>B</sub><br>(K) | φ <sub>0</sub><br>(°) | m<br>(-) |
| O2   | C1 | 543840.0                | 1.27                  | O2   | C1 | O2 | 135960.0                | 132                | O2      | C1 | C2 | C3 | 1258.9                  | 180                   | 2        |
| C1   | C2 | 353750.0                | 1.44                  | O2   | C1 | C2 | 54882.0                 | 114                | C1      | C2 | C3 | H1 | 1510.7                  | 180                   | 2        |
| C2   | C3 | 483414.0                | 1.365                 | C1   | C2 | C3 | 34927.0                 | 120                | C1      | C2 | C3 | C3 | 1510.7                  | 180                   | 2        |
| C3   | C3 | 483414.0                | 1.365                 | C3   | C2 | C3 | 90640.0                 | 120                | C2      | C3 | C3 | H1 | 1510.7                  | 180                   | 2        |
| C3   | H1 | 366000.0                | 0.95                  | C3   | C3 | C2 | 90640.0                 | 120                | C2      | C3 | C3 | C2 | 1510.7                  | 180                   | 2        |
| CX   | Br | 232678.1                | 1.906                 | C2   | C3 | H1 | 37263.0                 | 120                | C3      | C2 | C3 | C3 | 1510.7                  | 180                   | 2        |
| CX   | F  | 420739.8                | 1.382                 | C3   | C3 | H1 | 37263.0                 | 120                | H1      | C3 | C2 | C3 | 1510.7                  | 180                   | 2        |
| CX   | Cl | 279858.6                | 1.751                 | CX   | CX | Br | 457551.7                | 120                | H1      | C3 | C3 | H1 | 1510.7                  | 180                   | 2        |
|      |    |                         |                       | CX   | CX | F  | 108145.8                | 109.47             | H1      | C2 | C3 | H1 | 1510.7                  | 180                   | 2        |
|      |    |                         |                       | CX   | CX | Cl | 119660.8                | 120                | CX      | CX | CX | Br | 1696.3                  | 180                   | 2        |
|      |    |                         |                       |      |    |    |                         |                    | CX      | CX | CX | F  | 716.31                  | 0.0                   | 3        |
|      |    |                         |                       |      |    |    |                         |                    | CX      | CX | CX | Cl | 1696.3                  | 180                   | 2        |

\*In IRMOF-7 ligand the second benzene ring carbon atoms are treated as C3.

Table S3: Non-bonded interaction parameters used in this work for to perform MD simulations

| Atom type       | $\epsilon/k_B$ (K) | $\sigma$ (Å) |
|-----------------|--------------------|--------------|
| Zn              | 0.42               | 2.7          |
| O1              | 700                | 2.98         |
| O2              | 70.5               | 3.11         |
| C1              | 47.0               | 3.74         |
| C2              | 47.86              | 3.47         |
| C3              | 47.86              | 3.47         |
| H1              | 7.65               | 2.85         |
| Br              | 126.395            | 3.732        |
| F               | 25.173             | 2.997        |
| Cl              | 114.307            | 3.516        |
| CH <sub>4</sub> | 148                | 173          |

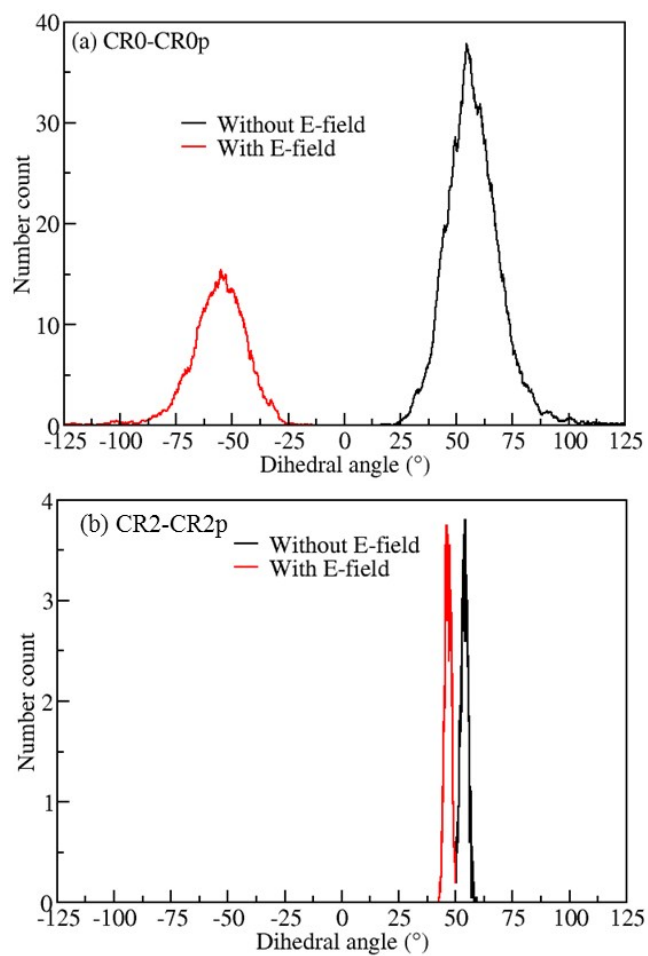

Figure S1. Rotational dihedral angle distributions of (a) CR0-CR0p and (b) CR2-CR2p substituted IRMOF-7-Cl<sub>2</sub> with and without E-field (1 V/nm) at 300 K.

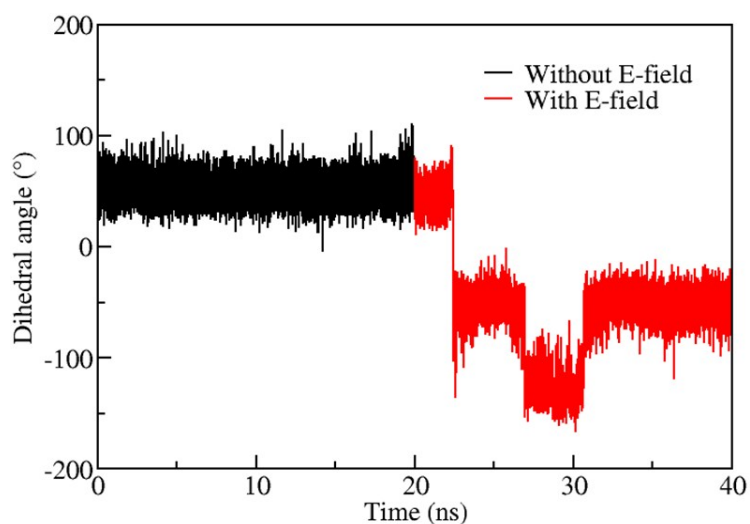

Figure S2. Mean value of rotational dihedral angle of CR0-CR0 substituted IRMOF-7-Cl<sub>2</sub> ligands as a function of MS simulations time

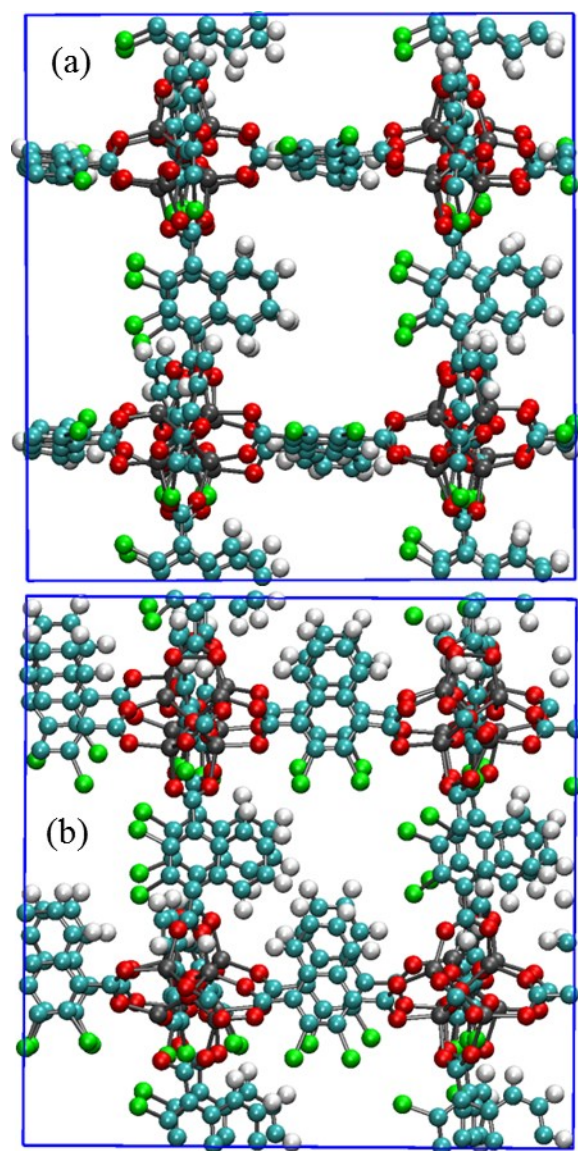

Figure S3. Snapshots of CR0-CR0p substituted IRMOF-7-Cl<sub>2</sub> in the y-direction obtained from methane diffusion simulations (a) before and (b) after the E-field (2 V/nm) is applied. Methane molecules are not shown for clarity.

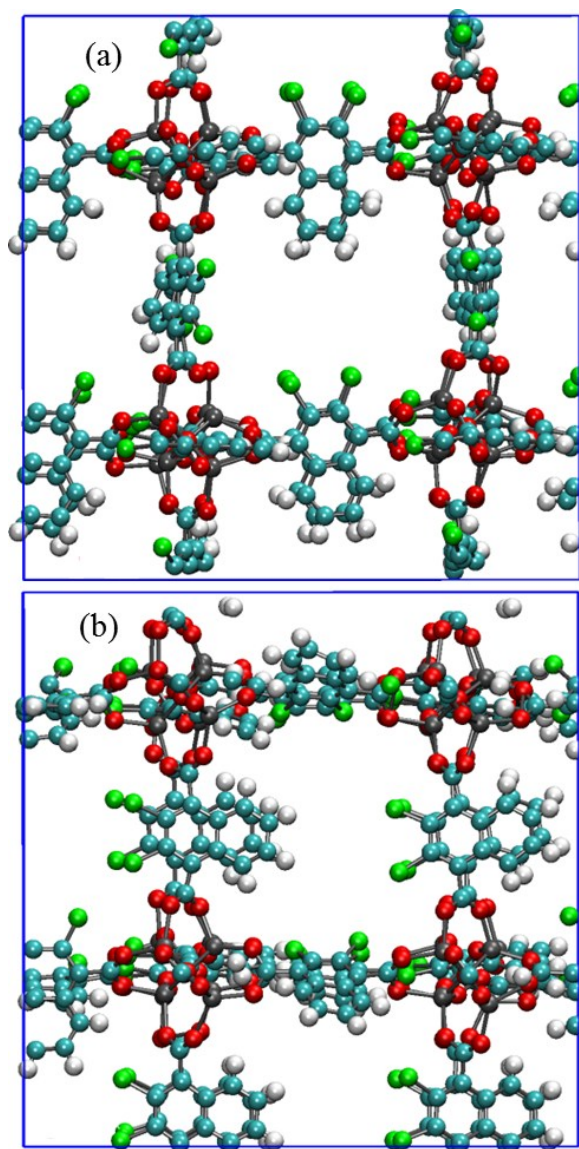

Figure S4. Snapshots of CR0-CR0p substituted IRMOF-7-Cl<sub>2</sub> in the z-direction obtained from methane diffusion simulations (a) before and (b) after the E-field (2 V/nm) is applied. Methane molecules are not shown for clarity.

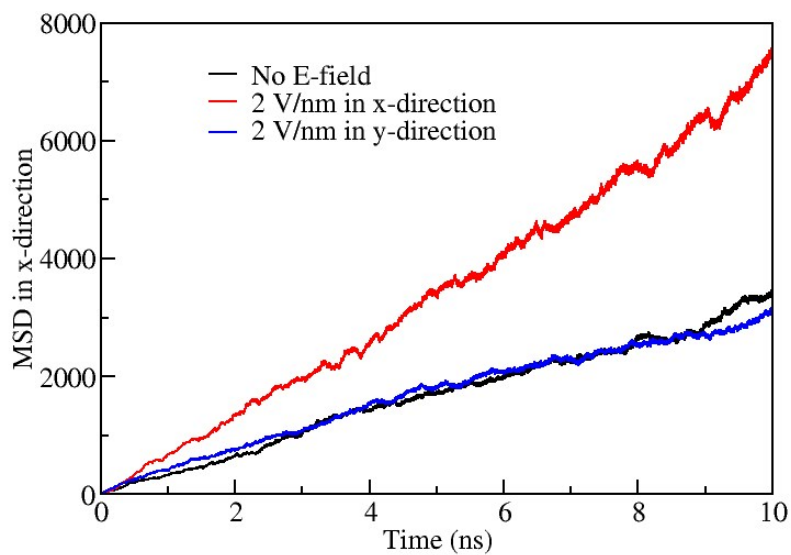

Figure S5. Comparison of MSD for methane molecules in the x-direction from MS simulations; before the E-field applied (black line), after the E-field applied in the x-direction (red line) and after the E-field applied in the y-direction (blue line).
